# Supplementary material for: PGM5: a novel diagnostic and prognostic biomarker for liver cancer
Source: PeerJ. 2019 Jun 11;7:e7070. doi: 10.7717/peerj.7070 (PMC6568247; doi:10.7717/peerj.7070)
Supplement: Supplemental Information 3 [file peerj-07-7070-s003.xlsx]

## Sheet: Sheet2
	characteristics	Number of patients(%)
	age
	<55	15(30)
	>=55	35(70)
	gender
	FEMALE	22(44)
	MALE	28(56)
	histological_type
	Hepatocellular Carcinoma	49(98)
	Hepatocholangiocarcinoma (Mixed)	1(2)
	histologic_grade
	NA	3(6)
	G1	5(10)
	G2	27(54)
	G3	15(30)
	stage
	NA	8(16)
	I	18(36)
	II	11(22)
	III	12(24)
	IV	1(2)
	T_classification
	T1	20(40)
	T2	14(28)
	T3	13(26)
	T4	3(6)
	N_classification
	N0	31(62)
	N1	1(2)
	NX	17(34)
	M_classification
	M0	33(66)
	M1	1(2)
	MX	16(32)
	radiation_therapy
	NA	7(14)
	NO	41(82)
	YES	2(4)
	residual_tumor
	NA	2(4)
	R0	40(80)
	R1	4(8)
	R2	1(2)
	RX	3(6)
	vital_status
	DECEASED	34(68)
	LIVING	16(32)
	relapse
	NO	15(36.59)
	YES	26(63.41)
	PGM5
	high	46(92)
	low	4(8)
